# Supplementary material for: Training Cognitive Functions Using Mobile Apps in Breast Cancer Patients: Systematic Review
Source: PubMed Central journal article supplement (PMC6444278; doi:10.2196/10855), 2019-03-19
Supplement: mhealth_v7i3e10855_app1.pdf [file mhealth_v7i3e10855_app1.pdf]

Multimedia Appendix 1. Summary of study characteristics in terms of study type, aim and sample.

| Authors                               | Aim                                                                                                                                 | Sample |                                                                                                        |           |                                                                                        |
|---------------------------------------|-------------------------------------------------------------------------------------------------------------------------------------|--------|--------------------------------------------------------------------------------------------------------|-----------|----------------------------------------------------------------------------------------|
|                                       |                                                                                                                                     | N      | Age                                                                                                    | Country   | Population Type                                                                        |
| Arean and colleagues, 2016 [24]       | To test outcome and clinical patterns of three different mobile apps for depression                                                 | 626    | Mean: 33.9<br>SD:11.8<br>Range: -                                                                      | USA       | Adults with mild to moderate depression                                                |
| Blackburne and colleagues, 2016 [25]  | To examine the efficacy of a training programme for inhibitory control                                                              | 52     | Mean: 35.2<br>SD: 14.1<br>Range: 19-61                                                                 | Australia | overweight or obese adult.<br>- training participant,<br>-waitlist/<br>control         |
| Bless and colleagues, 2014 [26]       | To test the feasibility of an app for training attention                                                                            | 28     | Mean: 23.3 e<br>23.9<br>Range: -                                                                       | Norway    | Healthy individuals<br>-non-training control group<br>-training control group          |
| Hill and colleagues, 2015 [27]        | To test the app feasibility                                                                                                         | 9      | Mean: 76,1<br>SD: 5.5<br>Range: 64-96                                                                  | USA       | Old Adults                                                                             |
| Hill and colleagues, 2017 [28]        | to evaluate the usability and acceptability of an app to train attention                                                            | 12     | Mean: 79<br>SD: 4.2<br>Range: -                                                                        | USA       | Old adults                                                                             |
| Lorusso and colleagues, 2017 [29]     | to evaluate learnability, usability, user satisfaction and quality of the interaction between an app to train language and children | 14     | Mean: 60.1<br>Month<br>SD: 6.2<br>Range: 50-68<br>month                                                | Italy     | Children with mild to severe language impairments or delays                            |
| Lu and colleagues, 2017 [30]          | to develop an improved design for game-based cognitive training for seniors using mobile devices.                                   | 9      | 1Mean = 82.7<br>2Mean = 69.6<br>SD1 = 7.2<br>SD2 = 9.4 1=<br>4 e 2= 5<br>Range1: 73-90<br>Range2:61-84 | Taiwan    | Old Adults                                                                             |
| Powell and colleagues, 2017 [31]      | To develop and test an app to train problem-solving in everyday life for patients following brain injury.                           | 23     | Mean: 44<br>SD:15<br>Range: 20-75                                                                      | USA       | Brain injuries in adults.<br>-Control group,<br>- Intervention                         |
| Shellington and colleagues, 2017 [32] | to explore the feasibility and utility of an app to deliver physical exercise outside the laboratory                                | 20     | Mean: 68<br>SD: 5.4<br>Range: 59-76                                                                    | Canada    | Older adults with and without Subjective Cognitive Complaints (SCC) and Mild Cognitive |
